# Supplementary material
Source: publisher figshare collection journal article supplement (https://gsajournals.figshare.com/articles/dataset/_/14387618)
Supplement: Supplementary file 1 [file 1]

## Sheet: Sheet1
Genotype	Length ± Standard Deviation
GR1-GAL4>UAS-GFP	487.6 ± 18.59
GR1-GAL4>UAS-Mcr-RNAi (BDSC)	408 ± 20.90
GR1-GAL4>UAS-Mcr-RNAi (VDRC)	409 ± 30.18
GR1-GAL4>UAS-Nrx-IV-RNAi (BDSC)	466 ± 18.32
GR1-GAL4>UAS-Nrx-IV-RNAi (VDRC)	391.9 ± 28.86
GR1-GAL4>UAS-Cora-RNAi (BDSC)	417.7 ± 28.34
GR1-GAL4>UAS-Cora-RNAi (VDRC)	414 ± 25.88
GR1-GAL4>UAS-Lac-RNAi	405 ± 29.25
GR1-GAL4>UAS-Cont-RNAi	410 ± 19.07
GR1-GAL4>UAS-Sinu-RNAi	447.6 ± 21.02
Genotype	Width ± Standard Deviation
GR1-GAL4>UAS-GFP	208 ± 12.31
GR1-GAL4>UAS-Mcr-RNAi (BDSC)	215 ± 15.83
GR1-GAL4>UAS-Mcr-RNAi (VDRC)	219.6 ± 20.21
GR1-GAL4>UAS-Nrx-IV-RNAi (BDSC)	222.6 16.61
GR1-GAL4>UAS-Nrx-IV-RNAi (VDRC)	226 ± 19.87
GR1-GAL4>UAS-Cora-RNAi (BDSC)	224 ± 25.8
GR1-GAL4>UAS-Cora-RNAi (VDRC)	237 ± 15.6
GR1-GAL4>UAS-Lac-RNAi	239.6 ± 20.40
GR1-GAL4>UAS-Cont-RNAi	211.8 ± 13.15
GR1-GAL4>UAS-Sinu-RNAi	221.7 ± 14.78
Genotype	Aspect ratio ± Standard Deviation
GR1-GAL4>UAS-GFP	2.3 ± 0.14
GR1-GAL4>UAS-Mcr-RNAi (BDSC)	1.9 ± 0.15
GR1-GAL4>UAS-Mcr-RNAi (VDRC)	1.87 ± 0.14
GR1-GAL4>UAS-Nrx-IV-RNAi (BDSC)	2.1 ± 0.17
GR1-GAL4>UAS-Nrx-IV-RNAi (VDRC)	1.7 ± 0.16
GR1-GAL4>UAS-Cora-RNAi (BDSC)	1.8 ± 0.18
GR1-GAL4>UAS-Cora-RNAi (VDRC)	1.7 ± 0.11
GR1-GAL4>UAS-Lac-RNAi	1.7 ± 0.19
GR1-GAL4>UAS-Cont-RNAi	1.9 ± 0.12
GR1-GAL4>UAS-Sinu-RNAi	2.0 ± 0.13

## Sheet: Sheet2
GR1-GAL4>UAS-GFP (control)	Sample #	Length (mm)	Width (mm)	Aspect ratio (length/width)
	1	474.646	203.566	2.33166
	2	499.297	196.132	2.54572
	3	522.85	193.175	2.70661
	4	469.184	203.913	2.3009
	5	499.396	206.279	2.42097
	6	499.563	198.114	2.52159
	7	469.976	210.033	2.23763
	8	449.199	200.502	2.24037
	9	497.085	198.348	2.50613
	10	498.635	218.741	2.27957
	11	482.785	200.306	2.41024
	12	467.608	219.791	2.12751
	13	481.408	216.953	2.21895
	14	460.585	207.562	2.21902
	15	481.288	198.352	2.42643
	16	469.027	236.97	1.97927
	17	480.539	212.977	2.2563
	18	475.478	210.903	2.25449
	19	526.697	203.766	2.58481
	20	514.885	205.945	2.50011
	21	498.193	211.687	2.35344
	22	489.604	217.031	2.25592
	23	521.91	213.779	2.44135
	24	486.487	217.235	2.23945
	25	499.608	228.322	2.18817
	26	487.091	208.293	2.33849
	27	476.55	192.416	2.47667
	28	477.843	202.902	2.35504
	29	455.48	193.764	2.35069
	30	458.022	195.601	2.34161
	31	492.652	210.698	2.33819
	32	508.96	201.278	2.52864
	33	481.544	198.145	2.43026
	34	485.184	216.452	2.24153
	35	514.725	220.847	2.33069
	36	492.313	219.64	2.24145
	37	497.53	223.181	2.22927
	38	496.624	237.719	2.08912
	39	444.374	217.973	2.03867
	40	467.86	206.508	2.26558
	41	495.478	207.246	2.39077
	42	453.663	198.378	2.28686
	43	509.924	204.088	2.49855
	44	472.209	196.807	2.39935
	45	449.308	193.911	2.31708
	46	480.855	225.757	2.12997
	47	473.076	226.877	2.08517
	48	446.838	201.479	2.21779
	49	496.76	212.076	2.34237
	50	459.714	204.351	2.24963
	51	485.925	224.143	2.16792
	52	475.349	199.759	2.37961
	53	483.742	196.44	2.46254
	54	482.87	191.163	2.52596
	55	459.808	199.208	2.30818
	56	489.827	202.824	2.41503
	57	506.058	199.394	2.53798
	58	504.578	228.588	2.20737
	59	490.529	232.98	2.10546
	60	530.027	213.292	2.48498
	61	468.068	213.836	2.18891
	62	498.102	207.269	2.40317
	63	480.024	206.477	2.32483
	64	492.221	230.092	2.13924
	65	470.339	221.559	2.12286
	66	480.826	215.311	2.23317
	67	492.61	210.097	2.34468
	68	520.399	220.657	2.35841
	69	498.297	218.118	2.28453
	70	498.881	218.394	2.28432
	71	505.911	216.915	2.3323
	72	516.336	212.594	2.42874
	73	474.722	232.704	2.04003
	74	487.429	198.507	2.45548
	75	481.334	218.133	2.20661
	76	476.371	230.439	2.06723
	77	478.682	222.869	2.14782
	78	488.465	206.936	2.36046
	79	499.867	210.277	2.37718
	80	483.656	197.848	2.44458
	81	514.933	232.681	2.21304
	82	512.053	209.773	2.44099
	83	488.765	214.844	2.27498
	84	509.87	192.006	2.65549
	85	504.478	211.278	2.38775
	86	481.492	196.585	2.44928
	87	478.994	206.542	2.31911
	88	485.737	213.467	2.27547
	89	526.582	208.293	2.52808
	90	494.749	212.713	2.3259
	91	484.747	204.603	2.36921
	92	493.68	197.067	2.50514
	93	500.145	198.778	2.5161
	94	487.955	217.235	2.24621
	95	492.698	205.915	2.39273
	96	475.319	213.125	2.23024
	97	503.486	207.074	2.43143
	98	476.53	208.369	2.28695
	99	482.883	205.17	2.35358
	100	494.005	185.627	2.66128
	101	478.979	198.3	2.41543
	102	478.842	194.335	2.464
	103	482.353	190.141	2.53682
	104	477.307	200.518	2.38037
	105	460.384	175.209	2.62763
	106	449.979	179.703	2.50401
	107	459.138	208.441	2.20272
	108	474.721	199.877	2.37507
	109	495.505	192.387	2.57556
	110	499.396	207.063	2.41181
	111	525.294	213.651	2.45865
	112	489.31	227.76	2.14836
	113	499.116	223.762	2.23057
	114	510.526	228.422	2.23501
	115	509.67	222.617	2.28945
	116	478.882	208.369	2.29824
	117	506.217	205.229	2.4666
	118	501.131	181.664	2.75856
	119	471.228	199.144	2.36627
Mean ± SD		487.6 ± 18.59	208 ± 12.31	2.3 ± 0.14
GR1-GAL4>UAS-Mcr-RNAi(BDSC)
	1	438.172	212.176	2.06513
	2	457.946	259.688	1.76345
	3	413.085	231.257	1.78626
	4	399.589	204.418	1.95476
	5	420.94	213.401	1.97253
	6	407.289	225.632	1.8051
	7	406.936	205.66	1.97868
	8	383.269	236.013	1.62393
	9	406.603	223.739	1.81731
	10	424.122	222.301	1.90787
	11	419.599	224.679	1.86755
	12	403.509	218.977	1.8427
	13	392.312	203.074	1.93187
	14	375.328	207.094	1.81236
	15	424.319	203.789	2.08215
	16	406.756	225.925	1.8004
	17	430.976	226.36	1.90394
	18	421.089	223.073	1.88767
	19	390.023	201.105	1.9394
	20	405.892	186.915	2.17153
	21	402.626	181.307	2.22069
	22	376.355	208.882	1.80176
	23	415.111	209.079	1.98543
	24	414.954	194.412	2.13441
	25	449.31	195.228	2.30146
	26	399.464	209.509	1.90667
	27	397.453	230.036	1.72779
	28	433.356	219.564	1.97371
	29	412.571	205.799	2.00473
	30	375.822	202.793	1.85323
	31	374.372	212.584	1.76105
	32	442.056	201.988	2.18853
	33	409.92	207.538	1.97516
	34	411.527	220.298	1.86805
	35	372.922	221.47	1.68385
	36	391.263	253.109	1.54583
	37	436.489	229.797	1.89945
	38	422.492	238.716	1.76985
	39	436.099	236.933	1.8406
	40	397.712	226.531	1.75566
	41	406.484	215.153	1.88928
	42	439.835	216.785	2.0289
	43	399.898	222.827	1.79466
	44	393.196	219.207	1.79372
	45	379.879	211.456	1.79649
	46	383.515	187.713	2.04309
	47	401.458	213.756	1.87811
	48	401.811	195.718	2.05301
Mean ± SD		408 ± 20.90	215 ± 15.83	1.9 ± 0.15
GR1-GAL4>UAS-Mcr-RNAi(VDRC)
	1	427.308	197.122	2.16773
	2	362.251	176	2.05824
	3	376.521	183.731	2.04931
	4	371.491	194.998	1.9051
	5	372.75	185.34	2.01117
	6	378.284	187.236	2.02036
	7	411.4	213.763	1.92456
	8	402.462	223.842	1.79797
	9	386.94	219.86	1.75994
	10	365.074	208.449	1.75138
	11	384.875	191.314	2.01175
	12	373.531	227.079	1.64494
	13	369.206	206.411	1.78869
	14	396.643	186.851	2.12278
	15	344.537	217.081	1.58714
	16	396.296	222.066	1.78459
	17	382.433	199.059	1.9212
	18	373.912	203.752	1.83513
	19	375.101	224.041	1.67425
	20	413.556	195.134	2.11934
	21	376.371	200.014	1.88172
	22	371.179	186.181	1.99365
	23	403.47	209.749	1.92358
	24	364.408	192.823	1.88986
	25	400.28	233.357	1.71531
	26	365.067	213.06	1.71345
	27	402.489	233.908	1.72071
	28	428.048	226.5	1.88984
	29	385.718	213.569	1.80606
	30	373.937	214.944	1.73969
	31	389.213	231.018	1.68477
	32	407.458	241.413	1.6878
	33	367.558	203.81	1.80343
	34	433.153	215.665	2.00845
	35	385.541	217.676	1.77117
	36	385.357	207.128	1.86048
	37	437.081	209.006	2.09124
	38	381.895	209.657	1.82152
	39	421.943	193.505	2.18053
	40	427.847	212.386	2.01448
	41	417.83	219	1.9079
	42	429.686	248.804	1.72701
	43	349.542	216.82	1.61213
	44	404.435	204.105	1.9815
	45	436.655	202.469	2.15665
	46	389.649	192.558	2.02354
	47	422.676	227.819	1.85531
	48	429.611	227.57	1.88782
	49	429.884	223.829	1.92059
	50	414.774	242.652	1.70934
	51	388.44	223.603	1.73719
	52	406	216.286	1.87714
	53	414.347	199.68	2.07506
	54	467.579	276.572	1.69062
	55	432.298	252.472	1.71226
	56	465.818	246.313	1.89116
	57	436.999	234.217	1.86579
	58	442.348	245.874	1.79908
	59	441.984	220.191	2.00728
	60	445.485	231.538	1.92403
	61	451.193	247.06	1.82625
	62	486.739	254.403	1.91326
	63	428.04	253.708	1.68714
	64	407.825	249.866	1.63217
	65	417.649	231.361	1.80518
	66	443.919	234.731	1.89118
	67	444.848	240.981	1.84599
	68	426.284	250.244	1.70347
	69	443.124	215.011	2.06094
	70	421.951	209.717	2.012
	71	415.298	216.151	1.92133
	72	447.961	238.09	1.88148
	73	436.92	228.607	1.91123
	74	426.785	252.329	1.69138
	75	403.086	219.331	1.8378
	76	441.911	243.203	1.81705
	77	407.038	231.374	1.75922
	78	395.221	240.549	1.643
	79	450.92	230.268	1.95824
	80	444.389	223.18	1.99117
	81	442.845	223.983	1.97714
	82	405.052	208.628	1.9415
	83	434.773	199.774	2.17632
Mean ± SD		409 ± 30.18	219.6 ± 20.21	1.87 ± 0.14
GR1-GAL4>UAS-Nrx-IV-RNAi(BDSC)
	1	502.486	233.321	2.15363
	2	497.96	253.148	1.96707
	3	481.478	235.234	2.0468
	4	438.748	225.842	1.94272
	5	473.16	218.321	2.16727
	6	480.323	249.765	1.9231
	7	461.228	243.722	1.89243
	8	474.787	215.462	2.20358
	9	493.127	217.788	2.26425
	10	446.1	243.397	1.83281
	11	446.933	214.297	2.08558
	12	468.04	225.452	2.07601
	13	474.109	228.048	2.07899
	14	469.52	242.22	1.9384
	15	475.464	227.057	2.09403
	16	472.789	241.275	1.95954
	17	432.702	233.204	1.85547
	18	491.855	204.286	2.40768
	19	457.331	215.019	2.12693
	20	456.075	218.435	2.08792
	21	433.337	221.559	1.95585
	22	482.195	196.279	2.45668
	23	459.958	198.117	2.32165
	24	472.876	222.894	2.12153
	25	450.253	223.663	2.01309
	26	464.243	196.263	2.36541
	27	468.042	205.487	2.27772
	28	467.133	211.972	2.20375
	29	475.542	226.706	2.09762
	30	446.548	236.659	1.88688
	31	484.719	197.618	2.45281
	32	483.328	264.44	1.82774
	33	500.585	243.454	2.05618
	34	451.319	229.684	1.96496
	35	470.84	212.129	2.21959
	36	482.635	228.656	2.11075
	37	437.188	231.938	1.88493
	38	429.405	216.934	1.97943
	39	476.55	204.1	2.33488
	40	462.226	208.08	2.22139
	41	478.345	204.924	2.33426
	42	447.857	185.641	2.41249
	43	445.29	223.518	1.99219
	44	465.702	213.045	2.18593
	45	461.67	219.529	2.103
	46	460.936	228.96	2.01317
Mean ± SD		466 ± 18.32	222.6 ± 16.61	2.1 ± 0.17
GR1-GAL4>UAS-Nrx-IV-RNAi(VDRC)
	1	401.65	230.838	1.73996
	2	363.328	221.04	1.64372
	3	427.12	239.523	1.78321
	4	346.533	205.54	1.68596
	5	403.781	244.252	1.65313
	6	402.156	221.301	1.81724
	7	409.549	231.819	1.76668
	8	366.036	254.986	1.43551
	9	446.753	214.8	2.07986
	10	368.173	218.984	1.68128
	11	419.877	232.895	1.80286
	12	411.813	212.713	1.936
	13	434.145	225.329	1.92672
	14	407.642	212.638	1.91707
	15	391.809	249.25	1.57195
	16	420.001	218.868	1.91897
	17	396.384	228.934	1.73143
	18	459.414	262.613	1.7494
	19	379.876	228.509	1.66241
	20	420.035	246.839	1.70166
	21	416.421	211.504	1.96886
	22	383.483	235.274	1.62994
	23	379.883	217.141	1.74948
	24	371.732	256.462	1.44946
	25	406.68	228.685	1.77834
	26	377.52	217.726	1.73392
	27	349.246	224.82	1.55345
	28	401.62	226.433	1.77368
	29	411.365	216.71	1.89823
	30	384.951	218.626	1.76077
	31	382.026	211.874	1.80308
	32	374.944	228.197	1.64307
	33	375.579	195.228	1.9238
	34	350.546	199.08	1.76083
	35	416.671	191.992	2.17025
	36	365.847	192.416	1.90133
	37	365.718	216.25	1.69118
	38	388.239	201.057	1.93099
	39	369.531	193.506	1.90966
	40	365.482	229.638	1.59156
	41	377.681	235.099	1.60648
	42	396.027	218.405	1.81327
	43	288.851	227.2	1.27135
	44	419.323	249.225	1.68251
	45	390.685	217.348	1.79751
	46	375.604	203.684	1.84405
	47	450.617	273.971	1.64476
	48	447.321	289.352	1.54594
	49	399.962	222.272	1.79943
	50	379.574	223.733	1.69655
	51	364.58	211.28	1.72558
	52	408.079	235.949	1.72952
	53	383.359	245.747	1.55997
	54	395.995	222.026	1.78355
	55	405.892	229.228	1.77069
	56	376.227	220.126	1.70914
	57	382.162	223.464	1.71017
	58	396.165	224.203	1.76699
	59	364.324	276.3	1.31858
	60	413.201	220.054	1.87773
	61	378.104	197.2	1.91736
	62	358.315	252.958	1.4165
	63	383.217	216.586	1.76935
	64	431.454	227.76	1.89434
Mean ± SD		391.9 ± 28.86	226 ± 19.87	1.7 ± 0.16
GR1-GAL4>UAS-cora-RNAi(BDSC)
	1	431.276	270.82	1.59248
	2	439.386	275.93	1.59238
	3	417.85	222.632	1.87686
	4	462.082	260.049	1.7769
	5	488.887	250.44	1.95211
	6	440.693	226.955	1.94176
	7	457.755	233.137	1.96346
	8	426.331	233.238	1.82788
	9	403.421	224.531	1.79673
	10	413.31	202.844	2.03758
	11	424.55	218.696	1.94128
	12	452.336	207.238	2.18269
	13	415.688	213.99	1.94256
	14	452.671	247.068	1.83217
	15	406.194	219.259	1.85258
	16	409.094	241.924	1.691
	17	394.022	196.185	2.00842
	18	408.962	241.074	1.69642
	19	393.621	236.212	1.66639
	20	417.989	221.84	1.88419
	21	419.275	231.482	1.81126
	22	386.852	210.03	1.84189
	23	378.504	222.848	1.69849
	24	373.166	216.209	1.72595
	25	366.216	214.709	1.70564
	26	383.423	208.524	1.83875
	27	432.303	204.696	2.11193
	28	404.419	191.386	2.11311
	29	429.385	239.523	1.79267
	30	341.448	196.829	1.73474
	31	457.156	277.59	1.64687
	32	408.817	263.285	1.55275
	33	417.277	244.3	1.70805
	34	455.902	248.894	1.83171
	35	412.624	252.27	1.63564
	36	490.258	266.534	1.83938
	37	458.987	250.807	1.83004
	38	444.071	228.488	1.94352
	39	411.652	247.198	1.66527
	40	414.98	250.032	1.65971
	41	413.937	249.931	1.65621
	42	415.728	247.884	1.67711
	43	434.552	270.786	1.60478
	44	439.232	263.097	1.66947
	45	459.363	277.59	1.65483
	46	412.119	240.333	1.71478
	47	446.291	260.019	1.71638
	48	426.047	237.5	1.79388
	49	443.194	249.311	1.77768
	50	431.451	218.987	1.97021
	51	416.204	215.673	1.92979
	52	401.442	217.792	1.84324
	53	443.058	221.712	1.99835
	54	386.431	203.274	1.90104
	55	435.497	186.405	2.33629
	56	432.973	203.367	2.12902
	57	410.1	183.667	2.23285
	58	379.118	202.929	1.86823
	59	363.002	189.537	1.9152
	60	438.515	214.21	2.04713
	61	369.803	192.81	1.91797
	62	406.176	190.1	2.13664
	63	382.518	195.435	1.95726
	64	373.284	223.214	1.67231
	65	406.967	196.109	2.07521
	66	426.663	202.635	2.10557
	67	407.61	203.146	2.00649
	68	383.103	203.378	1.8837
	69	432.155	174.989	2.46961
	70	395.424	194.062	2.03762
	71	427.409	199.128	2.1464
	72	381.202	199.826	1.90767
	73	414.601	201.202	2.06062
	74	400.94	199.057	2.0142
	75	431.576	208.048	2.07441
	76	424.9	201.163	2.11222
	77	427.079	215.093	1.98556
Mean ± SD		417.7 ± 28.34	224 ± 25.8	1.8 ± 0.18
GR1-GAL4>UAS-cora-RNAi(VDRC)
	1	412.822	223.239	1.84924
	2	474.505	231.434	2.05028
	3	425.176	209.85	2.02609
	4	421.094	258.717	1.62762
	5	391.872	229.695	1.70605
	6	394.624	228.503	1.727
	7	416.356	222.728	1.86935
	8	422.976	213.65	1.97976
	9	448.107	264.283	1.69556
	10	436.849	232.563	1.87841
	11	392.959	225.169	1.74517
	12	402.453	229.746	1.75173
	13	427.11	242.948	1.75803
	14	413.749	243.403	1.69985
	15	426.621	238.266	1.79052
	16	384.839	237.657	1.6193
	17	457.624	257.614	1.77639
	18	384.584	222.707	1.72686
	19	449.574	225.534	1.99338
	20	427.558	255.328	1.67454
	21	416.311	250.514	1.66183
	22	418.885	229.057	1.82874
	23	448.467	257.208	1.7436
	24	406.358	240.166	1.69199
	25	456.863	267.792	1.70604
	26	460.48	266.284	1.72928
	27	426.962	223.76	1.90812
	28	427.612	247.183	1.72994
	29	406.677	224.958	1.80779
	30	436.871	247.452	1.76548
	31	417.455	248.253	1.68157
	32	436.784	279.8	1.56106
	33	383.075	223.579	1.71338
	34	401.065	235.672	1.70179
	35	412.851	230.355	1.79224
	36	387.144	223.919	1.72895
	37	434.017	246.568	1.76023
	38	395.997	244.23	1.62141
	39	415.093	256.012	1.62138
	40	458.647	241.304	1.9007
	41	396.752	220.931	1.79582
	42	372.096	200.835	1.85274
	43	400.978	228.932	1.75152
	44	448.785	246.375	1.82155
	45	407.079	227.097	1.79253
	46	419.28	226.476	1.85132
	47	424.06	231.653	1.83058
	48	452.457	219.836	2.05816
	49	361.491	233.744	1.54653
	50	398.175	225.562	1.76526
	51	432.73	251.649	1.71958
	52	380.439	221.885	1.71458
	53	378.632	230.859	1.6401
	54	412.646	227.184	1.81635
	55	359.087	226.476	1.58554
	56	383.776	222.654	1.72364
	57	430.475	237.481	1.81267
	58	410.73	258.616	1.58818
	59	396.215	249.2	1.58995
	60	417.928	266.712	1.56696
	61	421.802	249.968	1.68742
	62	375.358	213.027	1.76202
	63	370.921	225.029	1.64833
	64	384.931	220.339	1.74699
	65	404.897	262.421	1.54293
	66	377.007	243.393	1.54896
	67	445.771	239.084	1.8645
	68	413.267	240.411	1.719
	69	397.584	223.887	1.77582
	70	443.065	251.837	1.75933
	71	420.621	235.917	1.78292
	72	388.776	237.311	1.63826
	73	398.143	221.76	1.79538
	74	455.046	245.732	1.8518
	75	410.108	255.455	1.6054
Mean ± SD		414 ± 25.88	237 ± 15.6	1.7 ± 0.11
GR1-GAL4>UAS-Lac-RNAi(BDSC)
	1	421.265	257.643	1.63507
	2	393.133	257.533	1.52653
	3	434.872	252.812	1.72014
	4	387.625	247.829	1.56408
	5	381.854	249.277	1.53185
	6	391.324	230.048	1.70105
	7	381.408	259.41	1.47029
	8	399.193	246.958	1.61644
	9	387.552	248.649	1.55863
	10	374.626	247.414	1.51417
	11	413.776	249.225	1.66025
	12	423.347	251.095	1.686
	13	424.807	261.475	1.62466
	14	345.015	249.083	1.38514
	15	418.769	244.417	1.71334
	16	390.384	262.246	1.48862
	17	384.114	252.085	1.52375
	18	426.499	257.627	1.65549
	19	399.305	256.935	1.55411
	20	386.291	254.375	1.51859
	21	381.702	249.808	1.52798
	22	472.713	250.255	1.88893
	23	371.394	230.923	1.6083
	24	367.266	221.494	1.65813
	25	433.66	263.271	1.6472
	26	478.811	256.271	1.86838
	27	406.996	248.226	1.63962
	28	389.818	245.706	1.58652
	29	408.043	216.755	1.88251
	30	447.793	262.639	1.70498
	31	449.124	193.099	2.32587
	32	402.959	219.092	1.83922
	33	348.158	204.323	1.70396
	34	423.012	223.167	1.8955
	35	413.186	220.254	1.87595
	36	398.685	225.825	1.76546
	37	361.585	236.641	1.52799
	38	372.573	216.999	1.71693
	39	383.827	170.963	2.24509
	40	394.635	212.754	1.85489
	41	458.733	186.164	2.46413
	42	453.679	265.225	1.71054
	43	400.659	233.295	1.71739
	44	432.664	267.791	1.61568
	45	399.958	238.74	1.67529
	46	395.327	229.63	1.72158
	47	417.005	227.304	1.83457
	48	409.62	235.917	1.73629
	49	419.739	249.15	1.68468
	50	368.594	222.835	1.65411
	51	409.218	228.868	1.78801
	52	440.507	261.464	1.68477
	53	454.009	267.689	1.69603
	54	407.388	253.879	1.60465
	55	382.164	230.104	1.66083
	56	392.893	249.439	1.57511
	57	374.375	232.155	1.61261
	58	408.458	243.63	1.67655
	59	381.607	242.683	1.57245
	60	459.817	204.538	2.24808
	61	415.918	247.981	1.67722
	62	408.901	233.981	1.74758
Mean ± SD		405 ± 29.25	239.6 ± 20.40	1.7 ± 0.19
GR1-GAL4>UAS-Cont-RNAi(BDSC)	1	415.003	198.107	2.09484
	2	398.802	201.229	1.98183
	3	409.591	222.968	1.83699
	4	394.445	199.509	1.97708
	5	406.53	230.758	1.76172
	6	412.525	224.622	1.83653
	7	441.886	217.887	2.02805
	8	390.885	207.489	1.88388
	9	404.615	187.674	2.15595
	10	421.167	205.585	2.04863
	11	418.04	212.227	1.96978
	12	404.664	220.148	1.83815
	13	426.677	201.924	2.11306
	14	402.787	207.136	1.94455
	15	426.217	218.657	1.94925
	16	394.305	185.193	2.12916
	17	439.074	212.886	2.06248
	18	435.286	218.598	1.99126
	19	401.868	212.287	1.89304
	20	408.949	204.323	2.00148
	21	393.444	179.336	2.19389
	22	427.819	229.648	1.86293
	23	413.712	221.877	1.8646
	24	418.419	208.259	2.00913
	25	430.386	214.273	2.00859
	26	421.346	213.707	1.97161
	27	400.046	215.133	1.85953
	28	436.26	228.557	1.90876
	29	401.589	207.32	1.93705
	30	420.401	219.558	1.91476
	31	400.191	216.373	1.84954
	32	378.785	206.289	1.83619
	33	391.363	194.825	2.00879
	34	402.613	222.081	1.81291
	35	337.657	199.229	1.69482
	36	406.381	207.028	1.96293
	37	404.457	209.919	1.92673
	38	396.335	226.511	1.74974
	39	352.317	202.978	1.73574
	40	452.916	253.673	1.78543
	41	456.482	207.834	2.19638
	42	442.294	238.057	1.85793
	43	409.074	216.034	1.89356
	44	427.424	204.416	2.09095
	45	382.662	208.946	1.83139
	46	396.707	213.245	1.86033
	47	409.859	208.293	1.9677
	48	400.105	214.451	1.86572
	49	415.387	189.271	2.19467
	50	404.457	228.474	1.77025
	51	418.579	203.917	2.05269
	52	396.239	198.071	2.00049
	53	410.156	232.069	1.76739
	54	452.087	202.365	2.23402
	55	432.37	213.394	2.02616
	56	433.152	215.388	2.01103
	57	405.544	220.498	1.83922
	58	420.688	221.995	1.89503
	59	401.155	199.876	2.00702
	60	404.852	198.745	2.03704
	61	410.814	208.79	1.96759
	62	401.821	206.15	1.94917
	63	405.047	199.369	2.03164
	64	422.079	239.746	1.76053
	65	405.936	204.778	1.98232
	66	406.419	221.23	1.83709
	67	403.156	215.34	1.87218
	68	421.966	200.821	2.1012
	69	429.199	215.133	1.99504
	70	447.941	224.715	1.99337
	71	414.291	216.579	1.91289
	72	404.15	209.722	1.92707
	73	410.907	220.726	1.86162
	74	400.63	233.366	1.71675
	75	400.048	192.924	2.0736
	76	412.843	211.291	1.95391
	77	387.721	221.291	1.75209
	78	404.047	198.107	2.03954
	79	394.759	213.26	1.85107
	80	399.293	208.961	1.91085
	81	396.432	198.729	1.99484
	82	451.472	191.47	2.35793
	83	422.718	203.812	2.07406
	84	413.26	203.166	2.0341
	85	386.708	194.342	1.98983
	86	389.033	195.494	1.99
	87	403.251	212.752	1.8954
	88	411.203	219.895	1.87
	89	404.016	219.489	1.84071
	90	401.757	218.973	1.83473
	91	414.706	220.264	1.88277
	92	395.992	250.388	1.58151
	93	406.131	207.892	1.95357
Mean ± SD		410 ± 19.07	211.8 ± 13.15	1.9 ± 0.12
GR1-GAL4>UAS-sinu-RNAi (VDRC)
	1	459.564	231.772	1.98283
	2	456.709	229.431	1.99062
	3	486.175	245.243	1.98242
	4	456.002	217.987	2.09188
	5	454.554	212.902	2.13504
	6	449.994	210.001	2.14282
	7	433.374	210.748	2.05636
	8	461.018	217.492	2.1197
	9	455.145	220.7	2.06228
	10	460.271	236.597	1.94538
	11	443.824	229.035	1.9378
	12	453.161	224.047	2.02262
	13	400.101	222.302	1.79981
	14	458.729	203.133	2.25827
	15	423.363	209.82	2.01774
	16	454.24	210.881	2.15401
	17	433.924	196.595	2.2072
	18	440.875	215.623	2.04466
	19	462.663	222.429	2.08005
	20	422.552	205.651	2.0547
	21	434.085	221.839	1.95676
	22	437.729	217.168	2.01562
	23	443.909	208.234	2.13178
	24	434.606	218.343	1.99047
	25	441.441	211.508	2.08711
	26	471.567	221.988	2.12429
	27	481.87	239.489	2.01208
	28	482.913	232.543	2.07666
	29	490.393	236.412	2.07432
	30	474.951	220.004	2.15883
	31	453.993	223.868	2.02795
	32	444.235	219.016	2.02832
	33	456.043	227.703	2.0028
	34	466.297	220.856	2.11132
	35	452.148	222.129	2.03552
	36	452.342	216.266	2.0916
	37	475.427	216.185	2.19917
	38	453.395	219.495	2.06563
	39	458.198	194.225	2.35911
	40	456.335	194.115	2.35085
	41	458.68	222.584	2.06071
	42	451.013	221.455	2.03659
	43	446.776	221.868	2.0137
	44	454.581	228.134	1.99261
	45	443.427	246.745	1.79711
	46	445.286	250.524	1.77742
	47	446.856	219.452	2.03624
	48	434.374	208.012	2.08822
	49	467.941	271.693	1.72232
	50	462.424	246.919	1.87278
	51	431.492	219.242	1.96811
	52	422.135	222.406	1.89804
	53	389.59	227.406	1.71319
	54	403.309	218.085	1.84932
	55	427.723	201.808	2.11946
	56	399.782	193.025	2.07114
	57	420.313	238.446	1.76272
	58	429.543	245.735	1.74799
Mean ± SD		447.6 ± 21.02	221.7 ± 14.78	2.0 ± 0.13

## Sheet: Sheet3
Slbo-GAL4 crosses		Phenotype of border cell migration
	Genotype	Complete (n)	Incomplete (n)	Dissociated(n)	Attached (n)	Total
	SlboGal4, UAS-mCD8::GFP/UAS-mCherry-RNAi(control)	70	11	2	0	81
	SlboGal4, UAS-mCD8::GFP::GFP/UAS-Mcr-RNAi	81	13	1	0	94
	SlboGal4, UAS-mCD8::GFP::GFP/UAS-NrxIV-RNAi	37	26	4	11	74
	SlboGal4, UAS-mCD8::GFP::GFP/UAS-cora-RNAi	39	16	4	12	67
	SlboGal4, UAS-mCD8::GFP/UAS-Cont-RNAi	34	30	15	17	85
C306-GAL4 crosses		Phenotype of border cell migration
	Genotype	Complete (n)	Incomplete (n)	Dissociated(n)	Failed (n)	Total
	C306GAL4/UASDcr;tsGAL80/+ (control)	71	18	0	1	91
	c306gal4,tsgal80,UAS-Dcr,UAS-Mcr-RNAi	65	30	5	3	98
	c306gal4,tsgal80,UASDcr,UAS-NrxIV-RNAi	39	18	0	2	59
	c306gal4, tsgal80, UASDcr,UAS-cora-RNAi	55	14	0	2	70
Slbo-GAL4 crosses		Phenotype of border cell migration
	Genotype	Complete (%)	Incomplete (%)	Dissociated (%)	Attached (%)	Total
	SlboGal4, UAS-mCD8::GFP/UAS-mCherry-RNAi(control)	0.8642	0.1358	0.0247	0	81
	SlboGal4, UAS-mCD8::GFP::GFP/UAS-Mcr-RNAi	0.8617	0.1383	0.0106	0	94
	SlboGal4, UAS-mCD8::GFP::GFP/UAS-NrxIV-RNAi	0.5	0.3514	0.0541	0.1486	74
	SlboGal4, UAS-mCD8::GFP::GFP/UAS-cora-RNAi	0.5821	0.2388	0.0597	0.1791	67
	SlboGal4, UAS-mCD8::GFP/UAS-Cont-RNAi	0.4	0.3529	0.1765	0.2	85
C306-GAL4 crosses		Phenotype of border cell migration
	Genotype	Complete (%)	Incomplete (%)	Dissociated (%)	Failed (%)	Total
	C306GAL4/UASDcr;tsGAL80/+ (control)	0.7802	0.1978	0	0.011	91
	c306gal4,tsgal80,UAS-Dcr,UAS-Mcr-RNAi	0.6633	0.3061	0.051	0.0306	98
	c306gal4,tsgal80,UASDcr,UAS-NrxIV-RNAi	0.661	0.3051	0	0.0339	59
	c306gal4, tsgal80, UASDcr,UAS-cora-RNAi	0.7857	0.2	0	0.0286	70
